# Supplementary material for: Cysteine–phenylalanine-derived self-assembled nanoparticles as glutathione-responsive drug-delivery systems in yeast
Source: Royal Society of Chemistry journal article supplement (doi:10.1039/d2tb01362b), 2022-01-01
Supplement: d2tb01362b1.pdf [file d2tb01362b1.pdf]

## Cysteine-phenylalanine Derived Self-assembled Nanoparticles as Glutathione Responsive Drug Delivery Systems in Yeast

Sonika Chibh,<sup>a</sup> Shradha Suyal,<sup>b</sup> Nidhi Aggarwal,<sup>a</sup> Anand Kumar Bachhawat<sup>b</sup> and Jiban Jyoti Panda<sup>a\*</sup>

a. Institute of Nano Science and Technology, Mohali, Punjab, India,140306

b. Indian Institute of Science Education and Research Mohali, Punjab, India,140306

\*Corresponding Author

Dr. Jiban Jyoti Panda

Institute of Nano Science and Technology, Sector 81, Mohali, Punjab, 140306, India.

Email: [jyoti@inst.ac.in](mailto:jyoti@inst.ac.in)

### Supporting Information:

#### Results:

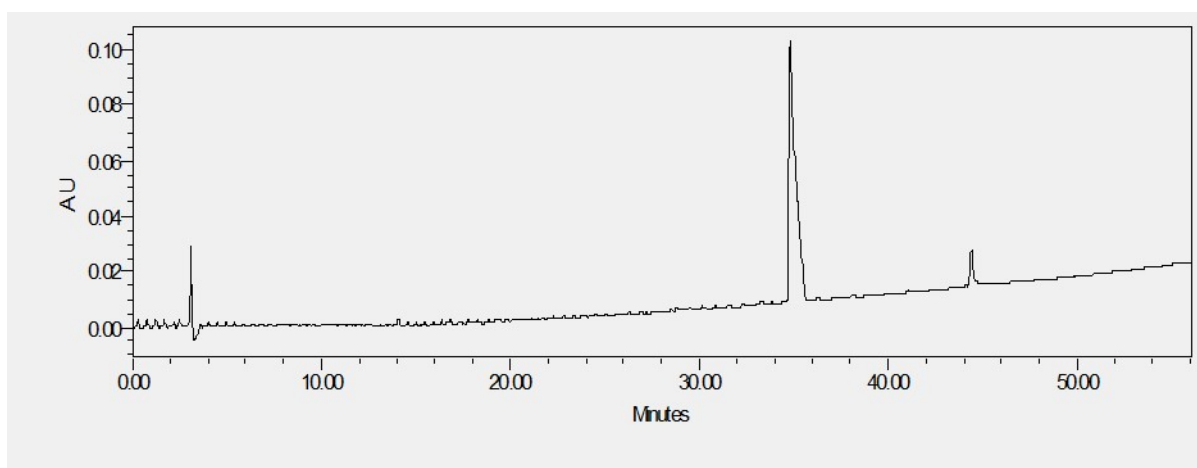

**Figure S1:** HPLC chromatogram of CFO.

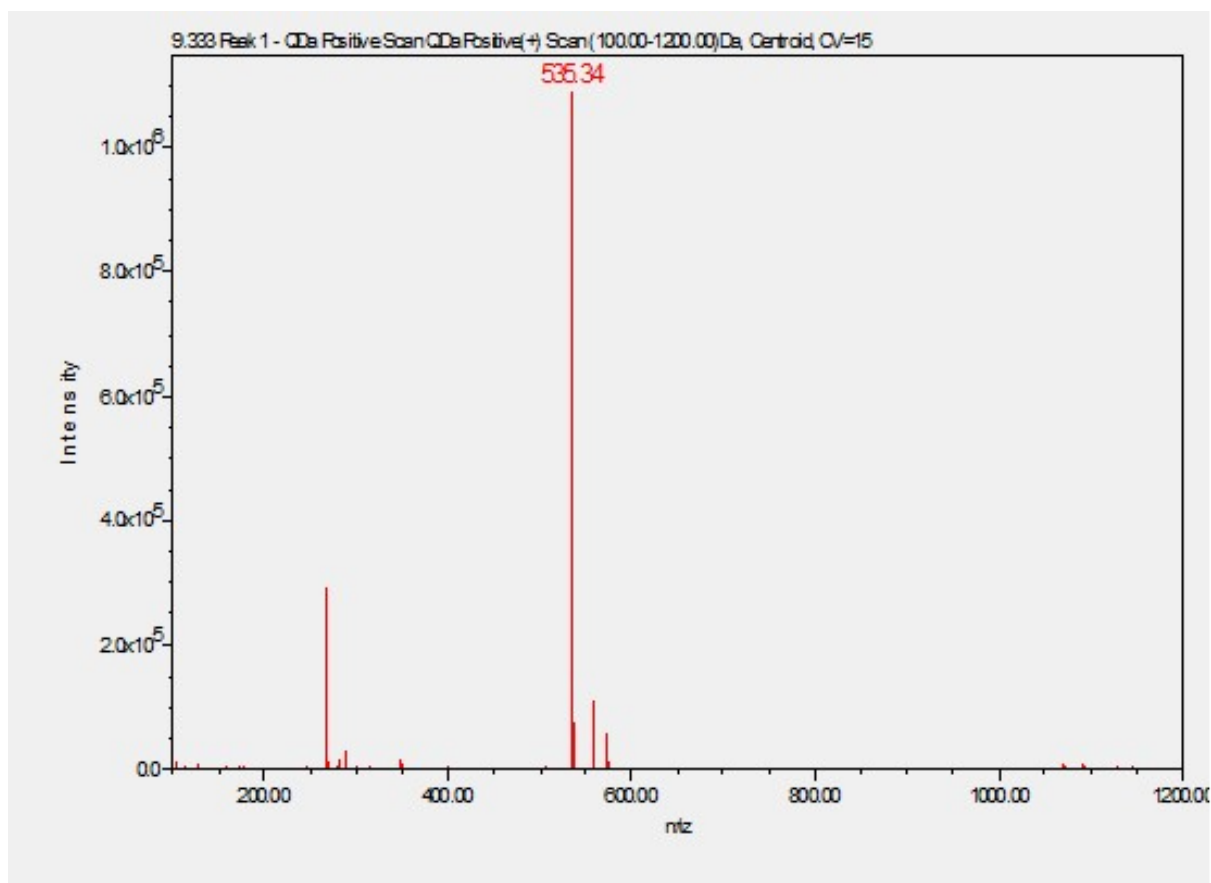

**Figure S2:** Molecular weight (m/z ratio) of CFO determined by mass spectrometric analysis.

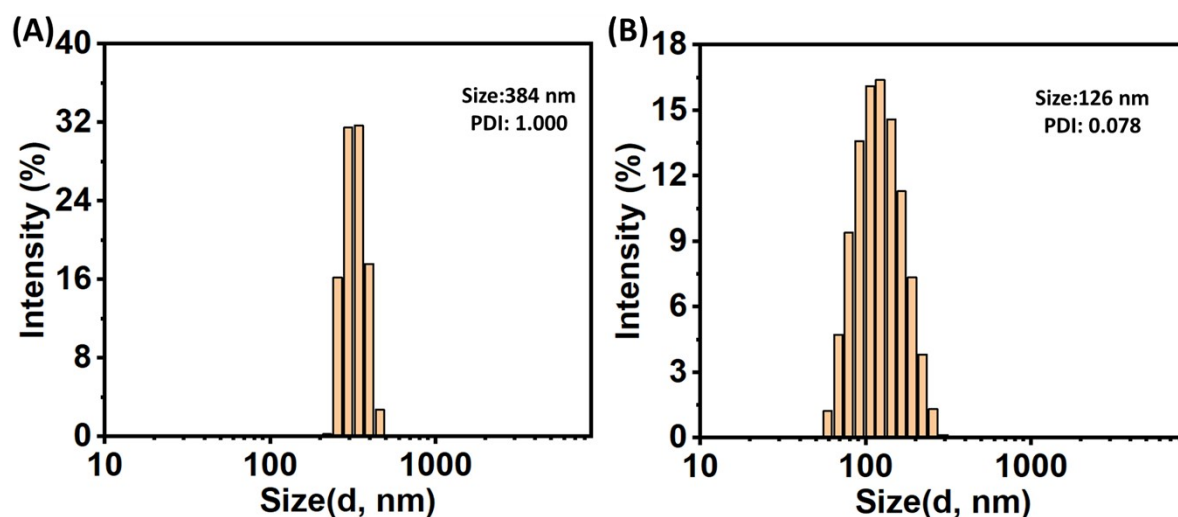

**Figure S3:** Intensity distribution profile of the (A) bare Terb and (B) NPs-Terb in aqueous medium determined using DLS. Terb in the nanoformulation exhibits better dispersibility with uniform particle size and lesser PDI.

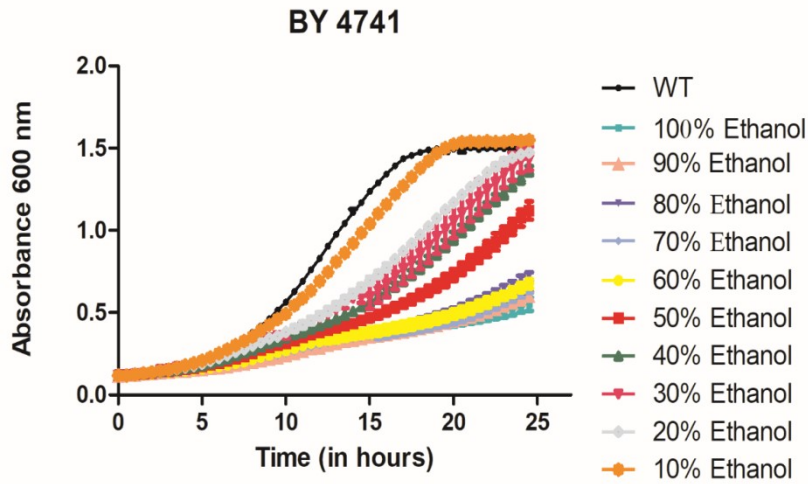

**Figure S4:** Graph showing growth of *S.cerevisiae* incubated with different ethanol: water combinations of 100 µg/ml of terbinafine.

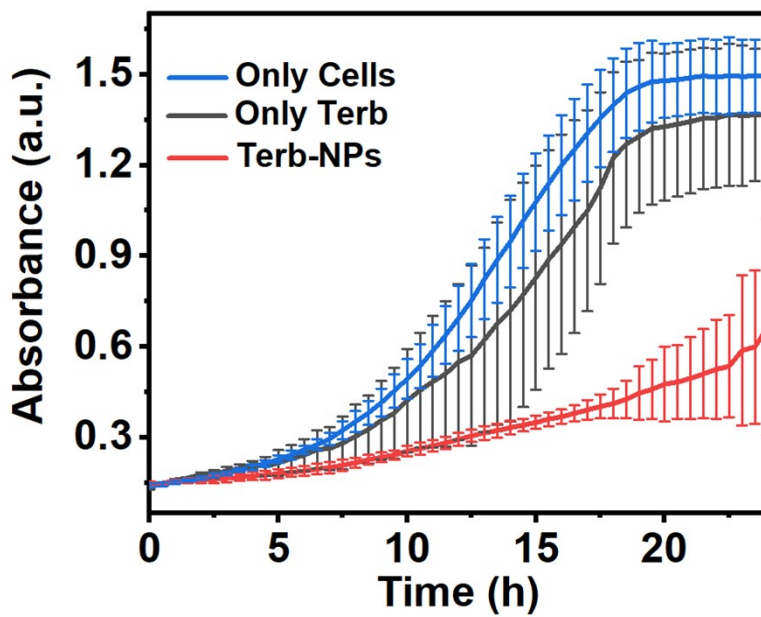

**Figure S5:** Graphs showing growth curve of *S. cerevisiae* incubated with only Terb and NPs-  
Terb for 24 h after being treated with 50 µg/mL of the formulation.
